# Supplementary material for: Mutations of CREBBP and SOCS1 are independent prognostic factors in diffuse large B cell lymphoma: mutational analysis of the SAKK 38/07 prospective clinical trial cohort
Source: Springer Nature journal article supplement (doi:10.1186/s13045-017-0438-7), 2017-03-17
Supplement: MOESM2 [file 12150200]

### ATM

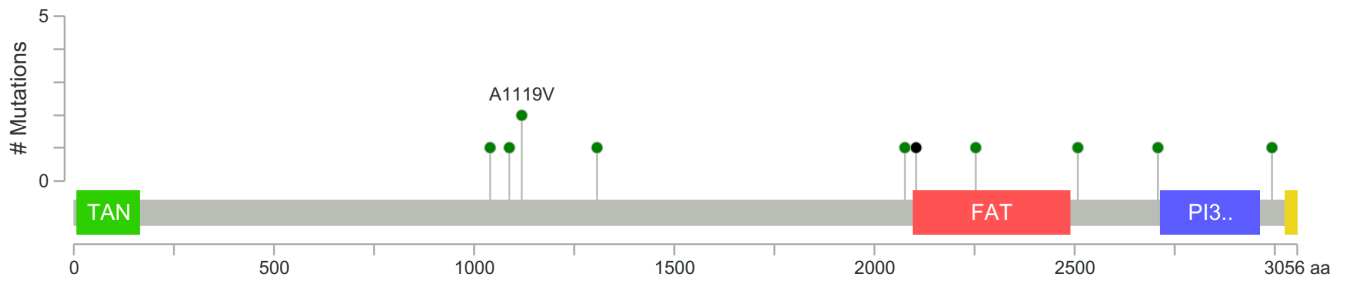

### B2M

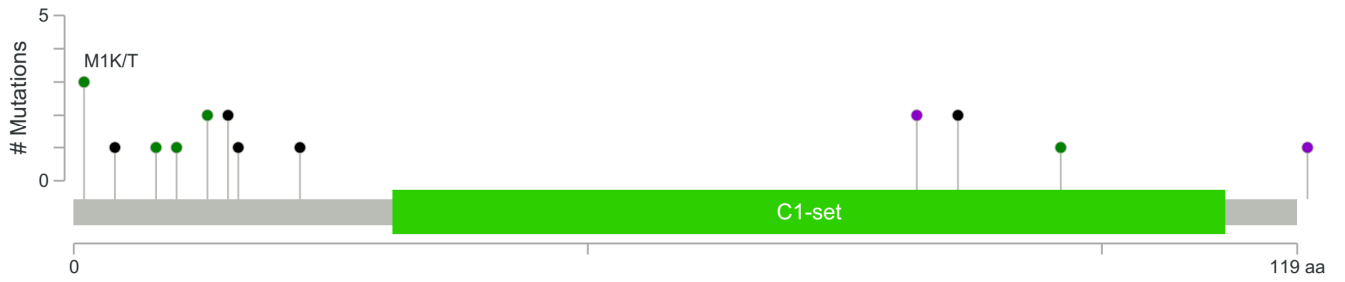

### BTG1

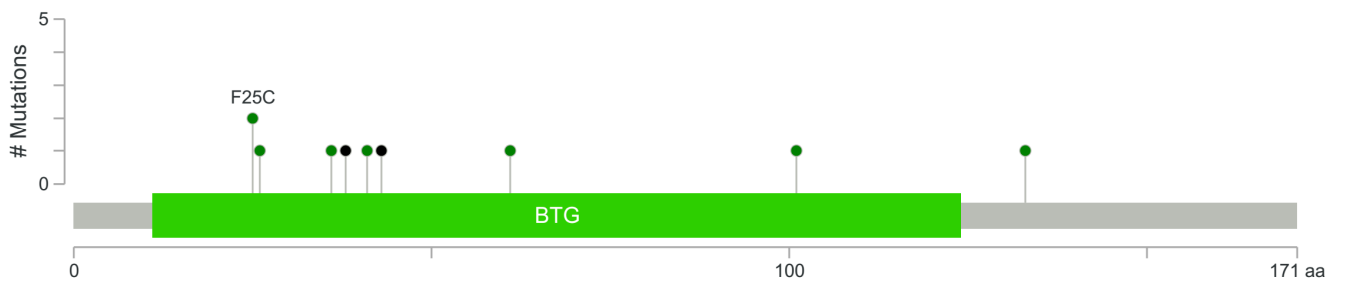

### CARD11

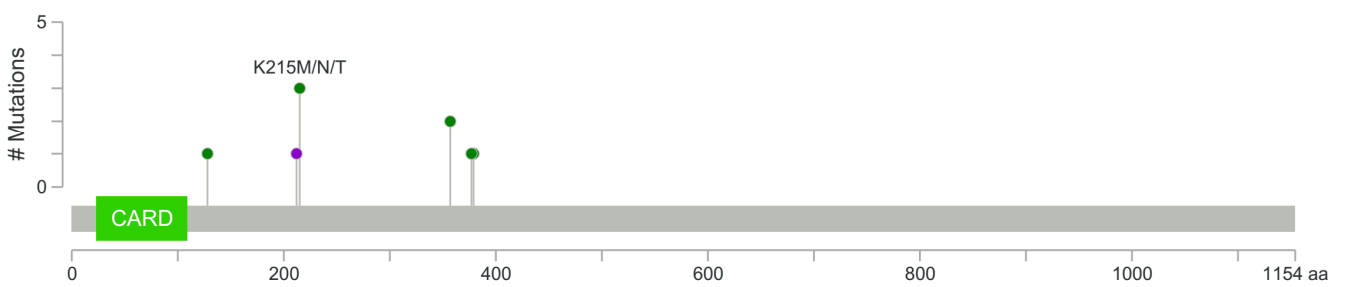

### CREBBP

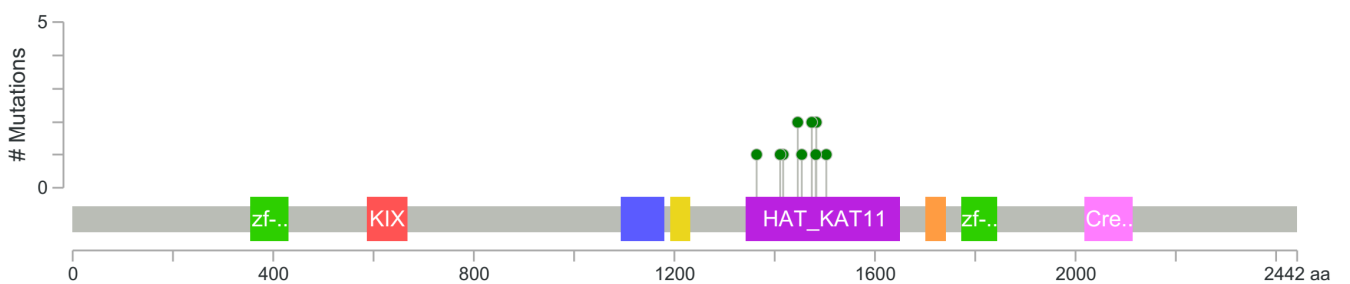

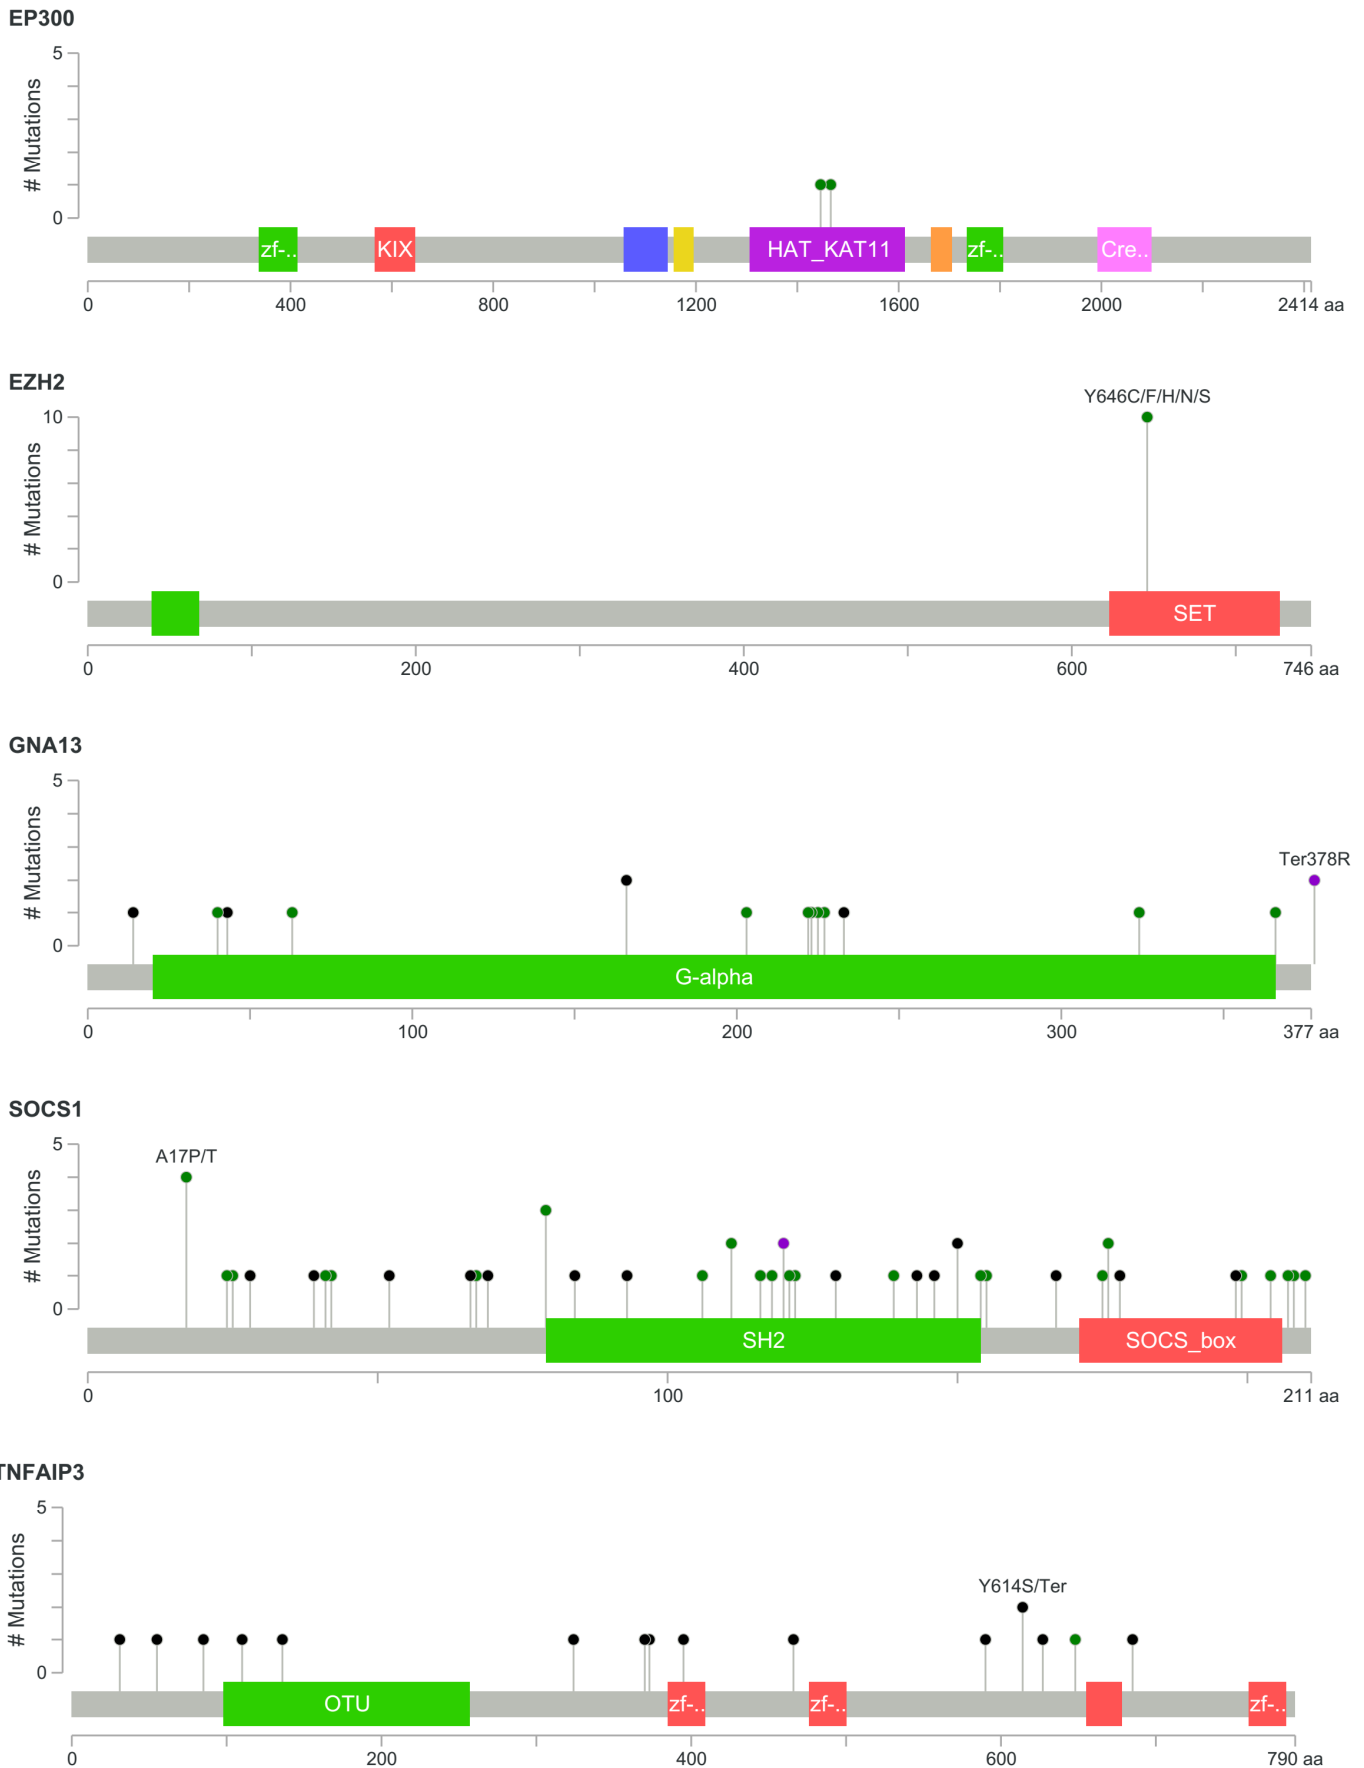

**Supplementary Figure 1.** Mapping of the detected mutations to the protein sequences within respective domains in the 10 most frequently mutated and relevant genes in this study. Mutations in *CREBBP* and *EP300* always occurred within the HAT domain responsible for acetylation. In *SOCS1*, mutations were distributed evenly along the protein sequence. Y-axis represents number of mutations detected at a particular amino acid position. green – missense mutation; black – frameshift insertion/deletion; purple – nonsense mutation.
